# Supplementary material for: Enabling a non-flammable methyl(2,2,2-trifluoroethyl) carbonate electrolyte in NMC622–graphite Li-ion cells by electrode pre-passivation
Source: Royal Society of Chemistry journal article supplement (doi:10.1039/d4ya00052h), 2024-01-01
Supplement: d4ya00052h1.pdf [file d4ya00052h1.pdf]

## Supporting Information

### **Enabling a non-flammable methyl(2,2,2-trifluoroethyl) carbonate electrolyte in NMC622-graphite Li-ion cells by electrode pre-passivation**

Matilde Longhini <sup>a,b</sup>, Florian Gebert <sup>a</sup>, Fosca Conti <sup>b,\*</sup> and Andrew J. Naylor <sup>a,\*</sup>

<sup>a</sup> Department of Chemistry – Ångström Laboratory, Uppsala University, SE-75121, Uppsala, Sweden.

<sup>b</sup> Department of Chemical Sciences, University of Padova, Via Marzolo 1, 35131, Padova, Italy.

\* Corresponding authors: andy.naylor@kemi.uu.se (A. J. Naylor), fosca.conti@unipd.it (F. Conti)

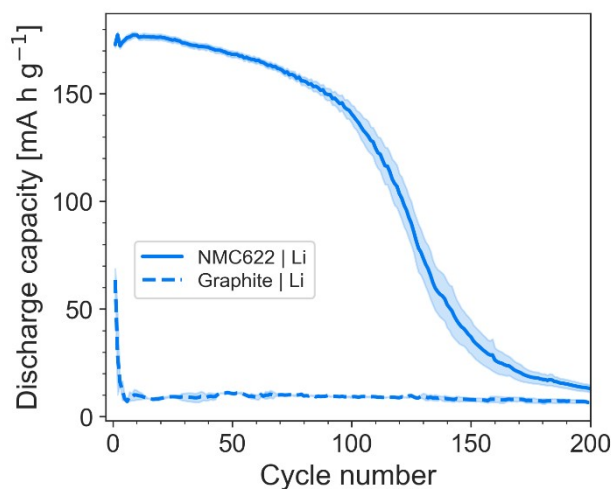

Figure S1: cycling data for NMC/Li and graphite/Li half cells containing pristine electrodes and LiPF<sub>6</sub>/FEMC electrolyte.

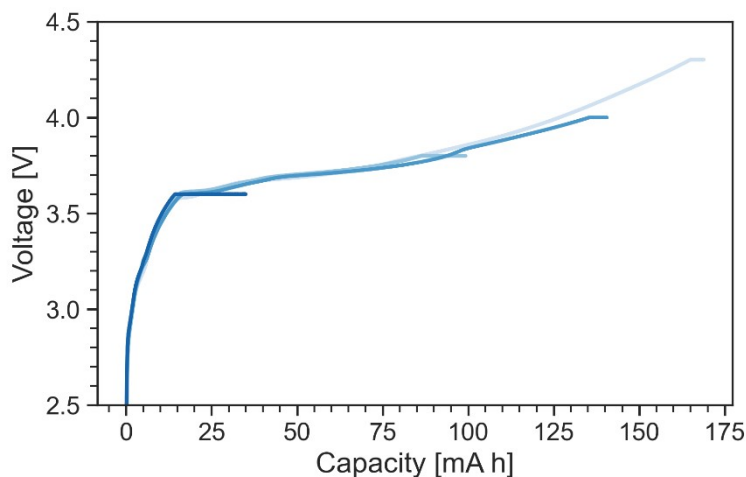

Figure S2: charge curves of the cells pre-passivated to 3.6, 3.8, 4.0 and 4.3 V.

*Table 1: compositions of the SEIs of the pre-passivated graphite electrodes before and after cycling in LiPF<sub>6</sub>/FEMC, as calculated from HAXPES. The probing depth is ca. 50 nm.*

|                   | C   | F   | Li  | O   | P  |
|-------------------|-----|-----|-----|-----|----|
| Pre-passivated    | 30% | 16% | 47% | 6%  | 1% |
| 4.3 V in FEMC     | 18% | 26% | 44% | 9%  | 3% |
| 1 cycle in FEMC   | 14% | 27% | 48% | 9%  | 2% |
| 5 cycles in FEMC  | 10% | 26% | 54% | 8%  | 2% |
| 30 cycles in FEMC | 12% | 24% | 50% | 10% | 4% |
